# Supplementary material
Source: PubMed Central journal article supplement (PMC10627034)
Supplement: NIHMS1871017-supplement-Table_S1.pdf [file NIHMS1871017-supplement-Table_S1.pdf]

**Supplementary Table S1**—Summary of case findings for 5 dogs and 5 cats that died or were euthanized shortly after SARS-CoV-2 diagnosis. All animals were confirmed positive for SARS-CoV-2 using the USDA’s case definition for SARS-CoV-2 in animals.<sup>19</sup>

| Case # | Breed                       | Age (y) | Comorbidities                                                      | Clinical Onset Date | Confirmatory Diagnosis Report Date (mm/dd/yy) | Death Date | Primary Reason for Death                    | Necropsy? | Algorithm Interpretation*     | Conclusion*              |
|--------|-----------------------------|---------|--------------------------------------------------------------------|---------------------|-----------------------------------------------|------------|---------------------------------------------|-----------|-------------------------------|--------------------------|
| 1      | Canine, German Shepherd Dog | 7       | Hemic neoplasia, most consistent with acute lymphoblastic leukemia | 4/15/20             | 5/21/20                                       | 7/11/20    | Severe anemia                               | No        | 1.i.; 2a.i.                   | Incidental finding       |
| 2      | Canine, Boxer mix           | 6       | Schwannoma                                                         | 6/19/20             | 6/25/20                                       | 6/21/20    | Intracranial Schwannoma                     | Yes       | 1.i.; 2a.i.                   | Incidental finding       |
| 3      | Feline, Domestic shorthair  | 11      | Hypertrophic cardiomyopathy                                        | 6/22/20             | 7/2/20                                        | 6/25/20    | Hypertrophic cardiomyopathy                 | No        | 1.i.; 2a.i.                   | Incidental finding       |
| 4      | Canine, Boxer               | 9       | Disc disease or spinal neoplasia                                   | 6/19/20             | 8/3/20                                        | 8/5/20     | Disc disease or spinal neoplasia            | No        | 1.i.; 2a.i.                   | Incidental finding       |
| 5      | Canine, Newfoundland        | 8       | Chronic allergies, bacterial bronchopneumonia                      | 8/3/20              | 8/7/20                                        | 8/3/20     | Bacterial bronchopneumonia, possible sepsis | Yes       | 1.ii.; 2b.i.; 3a.i.           | Incidental Finding       |
| 6      | Feline, Domestic shorthair  | 5       | Meningoencephalitis                                                | 9/24/20             | 10/2/20                                       | 9/25/20    | Severe suppurative meningoencephalitis      | Yes       | 1.ii.; 2b.i.; 3a.ii.; 4a.i.   | Incidental finding       |
| 7      | Feline, Domestic shorthair  | 16      | Hypertrophic cardiomyopathy                                        | 10/2/20             | 10/16/20                                      | 10/13/20   | Hypertrophic cardiomyopathy, heart failure  | Yes       | 1.ii.; 2b.i.; 3a.ii.; 4a.i.   | Incidental finding       |
| 8      | Feline, Domestic shorthair  | 3       | Urinary obstruction                                                | 1/1/21              | 1/4/21                                        | 1/2/21     | Urinary Obstruction                         | Yes       | 1.i.; 2a.i.                   | Incidental finding       |
| 9      | Canine, Shepherd mix        | 9       | Chronic airway disease                                             | 6/12/20             | 7/1/20                                        | 7/2/20     | Chronic airway disease                      | Partial   | 1.ii.; 2b.i.; 3a.ii.; 4a.ii.  | Contributing Factor      |
| 10     | Feline, Domestic shorthair  | 4       | Mild hypertrophic cardiomyopathy                                   | 12/10/20            | 12/15/20                                      | 12/15/20   | SARS-CoV-2                                  | Yes       | 1.ii.; 2b.ii.; 3b.ii.; 4b.ii. | Primary Reason for death |

\* Algorithm interpretation and conclusions are based on a standardized algorithm that uses clinical presentation, co-morbidities, presence of virus in critical organs, and histopathological changes in tissues attributable to SARS-CoV-2 to determine whether SARS-CoV-2 infection was an incidental finding, a contributing factor, or the primary reason for an animal’s death or euthanasia. This algorithm is presented in Figure 1.
